# Supplementary material
Source: PubMed Central journal article supplement (PMC5510473)
Supplement: NIHMS620149-supplement-fSupp_Fig_1_and_2.pdf [file NIHMS620149-supplement-fSupp_Fig_1_and_2.pdf]

**Supplemental Table 1.** Putative regulators of canine body size and their conserved function across other vertebrate species.

| Gene Symbol(s)                                | <i>CDK4</i>   | <i>GHR</i>                               | <i>GPC3-GPC4</i> locus         | <i>HMGA2</i>                                            | <i>IGF1</i>            | <i>IGF1R</i>                | <i>NCAPG-LCORL</i> locus        | <i>SMAD2</i>  | <i>STC2</i>   |
|-----------------------------------------------|---------------|------------------------------------------|--------------------------------|---------------------------------------------------------|------------------------|-----------------------------|---------------------------------|---------------|---------------|
| Association(s) with growth-related morbidity* | none reported | Laron syndrome; idiopathic short stature | Simpson-Golabi-Behmel syndrome | gigantism; proportionate short stature; osteopoikilosis | <i>IGF1</i> deficiency | <i>IGF1</i> , resistance to | dystocia, size-related (cattle) | none reported | none reported |
| <b>Cattle</b>                                 | --            | yes                                      | --                             | yes                                                     | --                     | --                          | yes                             | --            | --            |
| <b>Chicken</b>                                | --            | yes                                      | --                             | yes                                                     | --                     | yes                         | yes                             | --            | --            |
| <b>Dog</b>                                    | yes           | yes                                      | yes                            | yes                                                     | yes                    | yes                         | yes                             | yes           | yes           |
| <b>Horse</b>                                  | --            | --                                       | --                             | yes                                                     | --                     | --                          | yes                             | --            | --            |
| <b>Human</b>                                  | --            | yes                                      | yes                            | yes                                                     | yes                    | yes                         | yes                             | --            | --            |
| <b>Mouse</b>                                  | yes           | --                                       | --                             | yes                                                     | yes                    | --                          | --                              | --            | yes           |
| <b>Pig</b>                                    | --            | --                                       | --                             | yes                                                     | --                     | --                          | --                              | --            | --            |
| <b>References</b>                             | 1,2           | 3-9                                      | 1,4,5,10-17                    | 1,4,5,18-32                                             | 1,4,5,19, 33-36        | 5,36,37                     | 3,18,20,29,30, 38-42            | 4,5,19        | 4,5,43-45     |

\*Unless otherwise stated, all conditions are human and named according to OMIM ([www.omim.org](http://www.omim.org)).

## References

1. Vaysse, A. *et al.* Identification of genomic regions associated with phenotypic variation between dog breeds using selection mapping. *PLoS Genet* **7**, e1002316 (2011).
2. Rane, S. G. *et al.* Loss of Cdk4 expression causes insulin-deficient diabetes and Cdk4 activation results in beta-islet cell hyperplasia. *Nature Genetics* **22**, 44–52 (1999).
3. Rothhammer, S., Seichter, D., Förster, M. & Medugorac, I. A genome-wide scan for signatures of differential artificial selection in ten cattle breeds. *BMC Genomics* **14**, 908–908 (2013).
4. Boyko, A. R. *et al.* A simple genetic architecture underlies morphological variation in dogs. *PLoS Biol.* **8**, e1000451 (2010).
5. Rimbault, M. *et al.* Derived variants at six genes explain nearly half of size reduction in dog breeds. *Genome Research* (2013).  
doi:10.1101/gr.157339.113
6. Godowski, P. J. *et al.* Characterization of the human growth hormone receptor gene and demonstration of a partial gene deletion in two patients with Laron-type dwarfism. *Proc. Natl. Acad. Sci. U.S.A.* **86**, 8083–8087 (1989).
7. Amselem, S. *et al.* Laron dwarfism and mutations of the growth hormone-receptor gene. *N Engl J Med* **321**, 989–995 (1989).
8. Ouyang, J. H. *et al.* Single nucleotide polymorphism (SNP) at the GHR gene and its associations with chicken growth and fat deposition traits. *Br. Poult. Sci.* **49**, 87–95 (2008).
9. Zhou, Y. *et al.* A mammalian model for Laron syndrome produced by targeted disruption of the mouse growth hormone receptor/binding protein gene (the Laron mouse). *Proc. Natl. Acad. Sci. U.S.A.* **94**, 13215–13220 (1997).
10. Pilia, G. *et al.* Mutations in GPC3, a glypican gene, cause the Simpson-Golabi-Behmel overgrowth syndrome. *Nature Genetics* **12**, 241–247 (1996).
11. Veugelers, M. *et al.* GPC4, the gene for human K-glypican, flanks GPC3 on xq26: deletion of the GPC3-GPC4 gene cluster in one family with Simpson-Golabi-Behmel syndrome. *Genomics* **53**, 1–11 (1998).
12. Waterson, J., Stockley, T. L., Segal, S. & Golabi, M. Novel duplication in glypican-4 as an apparent cause of Simpson-Golabi-Behmel syndrome. *Am. J. Med. Genet.* **152A**, 3179–3181 (2010).
13. Paine-Saunders, S., Viviano, B. L., Zupicich, J., Skarnes, W. C. & Saunders, S. glypican-3 controls cellular responses to Bmp4 in limb patterning and skeletal development. *Developmental Biology* **225**, 179–187 (2000).
14. Cano-Gauci, D. F. *et al.* Glypican-3-deficient mice exhibit developmental overgrowth and some of the abnormalities typical of Simpson-Golabi-Behmel syndrome. *J. Cell Biol.* **146**, 255–264 (1999).
15. Chiao, E. *et al.* Overgrowth of a mouse model of the Simpson-Golabi-Behmel syndrome is independent of IGF signaling. *Developmental Biology* **243**, 185–206 (2002).
16. Oliver, F. *et al.* Regulatory variation at glypican-3 underlies a major growth QTL in mice. *PLoS Biol.* **3**, e135 (2005).

17. Xuan, J. Y., Hughes-Benzie, R. M. & MacKenzie, A. E. A small interstitial deletion in the GPC3 gene causes Simpson-Golabi-Behmel syndrome in a Dutch-Canadian family. *Journal of Medical Genetics* **36**, 57–58 (1999).
18. Pryce, J. E., Hayes, B. J., Bolormaa, S. & Goddard, M. E. Polymorphic regions affecting human height also control stature in cattle. *Genetics* **187**, 981–984 (2011).
19. Jones, P. *et al.* Single-nucleotide-polymorphism-based association mapping of dog stereotypes. *Genetics* **179**, 1033–1044 (2008).
20. Makvandi-Nejad, S. *et al.* Four Loci Explain 83% of Size Variation in the Horse. *PLoS ONE* **7**, e39929 (2012).
21. Sanna, S. *et al.* Common variants in the GDF5-UQCC region are associated with variation in human height. *Nature Genetics* **40**, 198–203 (2008).
22. Weedon, M. *et al.* A common variant of HMGA2 is associated with adult and childhood height in the general population. *Nature Genetics* **39**, 1245–1250 (2007).
23. Menten, B. *et al.* Osteopoikilosis, short stature and mental retardation as key features of a new microdeletion syndrome on 12q14. *Journal of Medical Genetics* **44**, 264–268 (2007).
24. Ligon, A. H. *et al.* Constitutional rearrangement of the architectural factor HMGA2: a novel human phenotype including overgrowth and lipomas. *Am. J. Hum. Genet.* **76**, 340–348 (2005).
25. Weedon, M. N. *et al.* Genome-wide association analysis identifies 20 loci that influence adult height. *Nature Genetics* **40**, 575–583 (2008).
26. Gudbjartsson, D. F. *et al.* Many sequence variants affecting diversity of adult human height. *Nature Genetics* **40**, 609–615 (2008).
27. Carty, C. L. *et al.* Genome-wide association study of body height in African Americans: the Women's Health Initiative SNP Health Association Resource (SHARe). *Human Molecular Genetics* **21**, 711–720 (2012).
28. N'Diaye, A. *et al.* Identification, replication, and fine-mapping of Loci associated with adult height in individuals of african ancestry. *PLoS Genet* **7**, e1002298 (2011).
29. Chung, J. *et al.* 5' disruption of the high mobility group at-hook 2 (hmga2) gene in Swine reduces postnatal growth. *Reprod. Fertil. Dev.* **26**, 117 (2013).
30. Wilkinson, S. *et al.* Signatures of diversifying selection in European pig breeds. *PLoS Genet* **9**, e1003453 (2013).
31. Song, C. *et al.* Evaluation of SNPs in the chicken HMGA2 gene as markers for body weight gain. *Animal Genetics* **42**, 333–336 (2011).
32. Zhou, X., Benson, K. F., Ashar, H. R. & Chada, K. Mutation responsible for the mouse pygmy phenotype in the developmentally regulated factor HMGI-C. *Nature* **376**, 771–774 (1995).
33. Sutter, N. B. *et al.* A Single IGF1 Allele Is a Major Determinant of Small Size in Dogs. *Science* **316**, 112–115 (2007).
34. Woods, K. A., Camacho-Hübner, C., Savage, M. O. & Clark, A. J. Intrauterine growth retardation and postnatal growth failure associated with deletion of the insulin-like growth factor I gene. *N Engl J Med* **335**, 1363–1367 (1996).

35. Baker, J., Liu, J. P., Robertson, E. J. & Efstratiadis, A. Role of insulin-like growth factors in embryonic and postnatal growth. *Cell* **75**, 73–82 (1993).
36. Liu, J. P., Baker, J., Perkins, A. S., Robertson, E. J. & Efstratiadis, A. Mice carrying null mutations of the genes encoding insulin-like growth factor I (Igf-1) and type 1 IGF receptor (Igf1r). *Cell* **75**, 59–72 (1993).
37. Hoopes, B. C., Rimbault, M., Liebers, D., Ostrander, E. A. & Sutter, N. B. The insulin-like growth factor 1 receptor (IGF1R) contributes to reduced size in dogs. *Mammalian Genome* (2012). doi:10.1007/s00335-012-9417-z
38. Bongiorno, S., Mancini, G., Chillemi, G., Pariset, L. & Valentini, A. Identification of a short region on chromosome 6 affecting direct calving ease in Piedmontese cattle breed. *PLoS ONE* **7**, e50137 (2012).
39. Lindholm-Perry, A. K. *et al.* Association, effects and validation of polymorphisms within the NCAPG - LCORL locus located on BTA6 with feed intake, gain, meat and carcass traits in beef cattle. *BMC Genet* **12**, 103 (2011).
40. Setoguchi, K. *et al.* Cross-breed comparisons identified a critical 591-kb region for bovine carcass weight QTL (CW-2) on chromosome 6 and the Ile-442-Met substitution in NCAPG as a positional candidate. *BMC Genet* **10**, 43 (2009).
41. Metzger, J., Schrimpf, R., Philipp, U. & Distl, O. Expression levels of LCORL are associated with body size in horses. *PLoS ONE* **8**, e56497 (2013).
42. Tetens, J., Widmann, P., Kühn, C. & Thaller, G. A genome-wide association study indicates LCORL/NCAPG as a candidate locus for withers height in German Warmblood horses. *Animal Genetics* **44**, 467–471 (2013).
43. Gagliardi, A. D., Kuo, E. Y. W., Raulic, S., Wagner, G. F. & Dimattia, G. E. Human stanniocalcin-2 exhibits potent growth-suppressive properties in transgenic mice independently of growth hormone and IGFs. *Am. J. Physiol. Endocrinol. Metab.* **288**, E92–105 (2005).
44. Chang, A. C.-M. *et al.* The murine stanniocalcin 2 gene is a negative regulator of postnatal growth. *Endocrinology* **149**, 2403–2410 (2008).
45. Johnston, J. *et al.* Human stanniocalcin-1 or -2 expressed in mice reduces bone size and severely inhibits cranial intramembranous bone growth. *Transgenic Res.* **19**, 1017–1039 (2010).

**Supplemental Table 2.** GO terms associated with canine body size candidate genes

| GO Term                                                   | Cluster | Genes                    | Fold Enrichment | P-value |
|-----------------------------------------------------------|---------|--------------------------|-----------------|---------|
| <b>Biological Process</b>                                 |         |                          |                 |         |
| positive regulation of cellular protein metabolic process | 4       | IGF1, CDK4, GHR          | 19.35           | 0.008   |
| positive regulation of protein metabolic process          | 4       | IGF1, CDK4, GHR          | 18.56           | 0.008   |
| positive regulation of signal transduction                | 5       | GPC3, IGF1, GHR          | 15.29           | 0.012   |
| positive regulation of cell communication                 | 5       | GPC3, IGF1, GHR          | 13.71           | 0.015   |
| enzyme linked receptor protein signaling pathway          | 7       | IGF1R, SMAD2, GHR        | 13.19           | 0.016   |
| positive regulation of cell proliferation                 | 1       | IGF1R, IGF1, CDK4        | 10.89           | 0.023   |
| regulation of cellular protein metabolic process          | 4       | IGF1, CDK4, GHR          | 9.51            | 0.030   |
| positive regulation of macromolecule biosynthetic process | 2       | IGF1R, IGF1, SMAD2, CDK4 | 9.19            | 0.005   |
| protein amino acid phosphorylation                        | 3       | IGF1R, SMAD2, CDK4, GHR  | 9.01            | 0.006   |
| positive regulation of cellular biosynthetic process      | 2       | IGF1R, IGF1, SMAD2, CDK4 | 8.78            | 0.006   |

|                                                |   |                          |      |       |
|------------------------------------------------|---|--------------------------|------|-------|
| positive regulation of<br>biosynthetic process | 2 | IGF1R, IGF1, SMAD2, CDK4 | 8.65 | 0.006 |
| phosphorylation                                | 3 | IGF1R, SMAD2, CDK4, GHR  | 7.52 | 0.009 |
| phosphorus metabolic process                   | 3 | IGF1R, SMAD2, CDK4, GHR  | 6.18 | 0.016 |
| phosphate metabolic process                    | 3 | IGF1R, SMAD2, CDK4, GHR  | 6.18 | 0.016 |
| regulation of apoptosis                        | 6 | IGF1R, IGF1, GHR         | 5.61 | 0.078 |
| regulation of programmed<br>cell death         | 6 | IGF1R, IGF1, GHR         | 5.55 | 0.079 |
| regulation of cell death                       | 6 | IGF1R, IGF1, GHR         | 5.53 | 0.080 |
| <hr/> <b>Cellular Component</b> <hr/>          |   |                          |      |       |
| extracellular space                            | 5 | GPC3, IGF1, GHR          | 7.00 | 0.050 |
| extracellular region part                      | 5 | GPC3, IGF1, GHR          | 4.99 | 0.092 |
| <hr/> <b>Molecular Function</b> <hr/>          |   |                          |      |       |
| enzyme binding                                 | 7 | IGF1R, SMAD2, GHR        | 8.27 | 0.039 |
